# Supplementary material for: Longitudinal trajectories of anxiety, depression, and bipolar disorder in inflammatory bowel disease: a population-based cohort study
Source: PubMed Central journal article supplement — eClinicalMedicine. 2023 May 5;59:101986. doi: 10.1016/j.eclinm.2023.101986 (PMC10184046; doi:10.1016/j.eclinm.2023.101986), 2023-05-05
Supplement: mmc1.pdf [file mmc1.pdf]

## Supplementary materials

### Contents

|                              |   |
|------------------------------|---|
| Supplementary figure 1. .... | 2 |
| Supplementary table 1 .....  | 3 |
| Supplementary table 2. ....  | 4 |
| Supplementary table 3. ....  | 5 |
| Supplementary table 4. ....  | 6 |
| Supplementary table 5. ....  | 7 |
| Supplementary table 6. ....  | 8 |

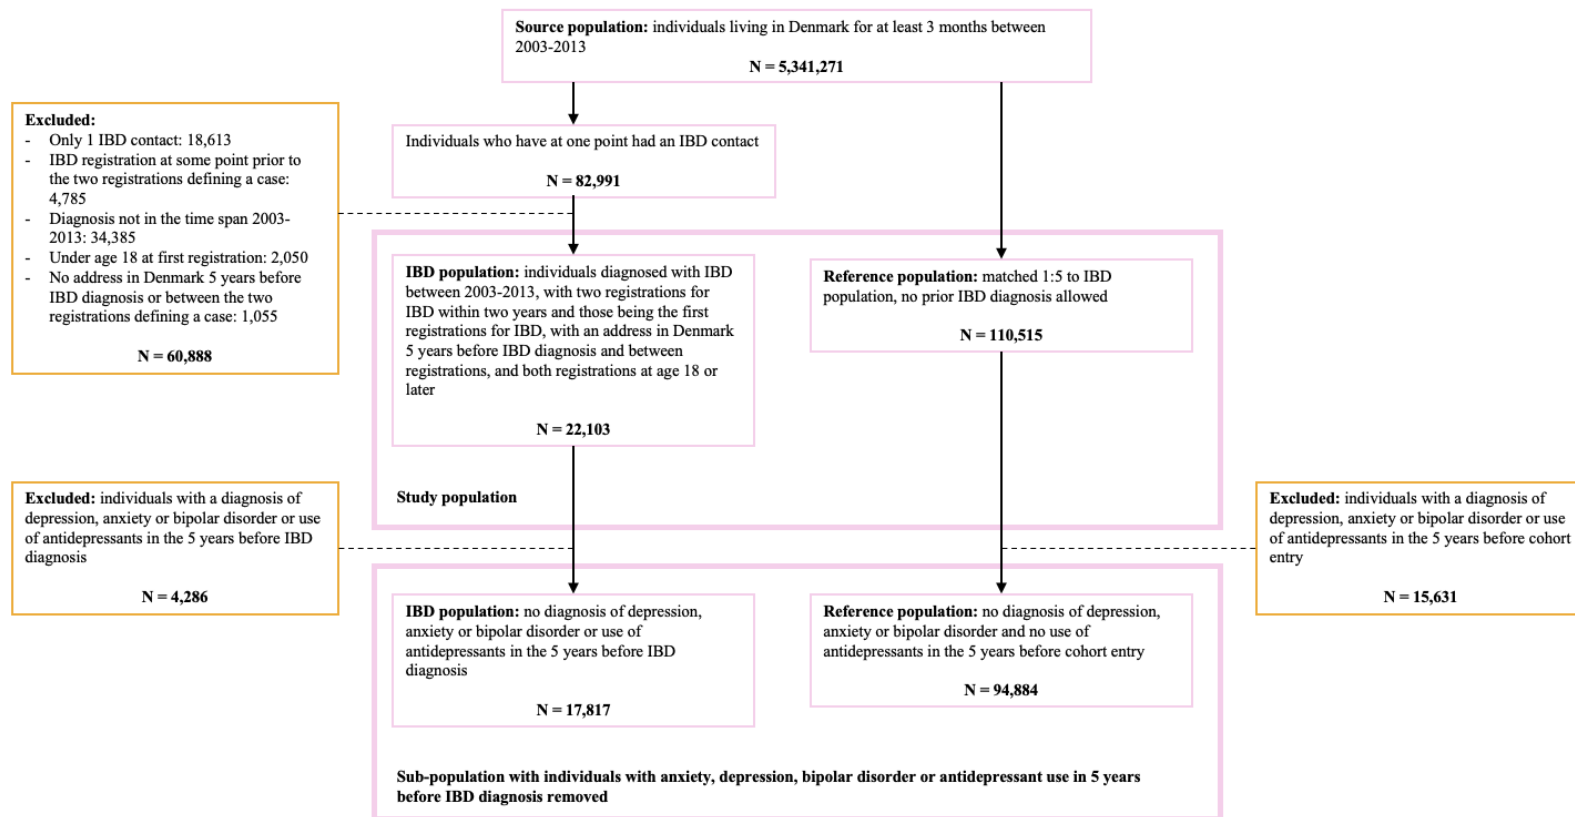

Supplementary figure 1. Flow chart describing formation of the IBD and reference cohorts. IBD, inflammatory bowel disease.

| Time | IBD    |             |                |                      |                     | References |             |                |                      |                     |
|------|--------|-------------|----------------|----------------------|---------------------|------------|-------------|----------------|----------------------|---------------------|
|      | N      | Anxiety (%) | Depression (%) | Bipolar disorder (%) | Antidepressants (%) | N          | Anxiety (%) | Depression (%) | Bipolar disorder (%) | Antidepressants (%) |
| -5   | 22,103 | 45 (0·2)    | 151 (0·7)      | 17 (0·1)             | 1,856 (8·4)         | 110,515    | 130 (0·1)   | 547 (0·5)      | 109 (0·1)            | 6,695 (6·1)         |
| -4   | 22,103 | 38 (0·2)    | 165 (0·7)      | 24 (0·1)             | 2,029 (9·2)         | 110,515    | 139 (0·1)   | 598 (0·5)      | 114 (0·1)            | 7,483 (6·8)         |
| -3   | 22,103 | 45 (0·2)    | 182 (0·8)      | 26 (0·1)             | 2,264 (10·2)        | 110,515    | 172 (0·2)   | 675 (0·6)      | 150 (0·1)            | 8,201 (7·4)         |
| -2   | 22,103 | 50 (0·2)    | 199 (0·9)      | 24 (0·1)             | 2,489 (11·3)        | 110,515    | 176 (0·2)   | 744 (0·7)      | 158 (0·1)            | 8,938 (8·1)         |
| -1   | 22,103 | 54 (0·2)    | 267 (1·2)      | 28 (0·1)             | 2,809 (12·7)        | 110,515    | 226 (0·2)   | 803 (0·7)      | 171 (0·2)            | 9,693 (8·8)         |
| 0    | 21,657 | 77 (0·4)    | 368 (1·7)      | 31 (0·1)             | 3,018 (13·9)        | 109,699    | 248 (0·2)   | 830 (0·8)      | 181 (0·2)            | 10,087 (9·2)        |
| 1    | 21,304 | 80 (0·4)    | 322 (1·5)      | 36 (0·2)             | 3,002 (14·1)        | 108,305    | 262 (0·2)   | 828 (0·8)      | 196 (0·2)            | 10,221 (9·4)        |
| 2    | 20,958 | 75 (0·4)    | 273 (1·3)      | 39 (0·2)             | 2,979 (14·2)        | 106,894    | 293 (0·3)   | 850 (0·8)      | 186 (0·2)            | 10,327 (9·7)        |
| 3    | 20,618 | 67 (0·3)    | 265 (1·3)      | 41 (0·2)             | 2,861 (13·9)        | 105,543    | 299 (0·3)   | 897 (0·8)      | 199 (0·2)            | 10,287 (9·7)        |
| 4    | 20,296 | 60 (0·3)    | 236 (1·2)      | 45 (0·2)             | 2,811 (13·9)        | 104,117    | 300 (0·3)   | 810 (0·8)      | 208 (0·2)            | 10,346 (9·9)        |
| 5    | 18,296 | 60 (0·3)    | 233 (1·3)      | 47 (0·3)             | 2,573 (14·1)        | 94,154     | 263 (0·3)   | 734 (0·8)      | 196 (0·2)            | 9,574 (10·2)        |
| 6    | 16,112 | 70 (0·4)    | 209 (1·3)      | 40 (0·2)             | 2,257 (14·0)        | 83,276     | 240 (0·3)   | 675 (0·8)      | 193 (0·2)            | 8,575 (10·3)        |
| 7    | 13,920 | 61 (0·4)    | 152 (1·1)      | 33 (0·2)             | 1,957 (14·1)        | 72,078     | 184 (0·3)   | 549 (0·8)      | 156 (0·2)            | 7,411 (10·3)        |
| 8    | 11,835 | 49 (0·4)    | 149 (1·3)      | 26 (0·2)             | 1,658 (14·0)        | 61,294     | 167 (0·3)   | 467 (0·8)      | 141 (0·2)            | 6,308 (10·3)        |
| 9    | 9,802  | 45 (0·5)    | 111 (1·1)      | 18 (0·2)             | 1,385 (14·1)        | 50,800     | 174 (0·3)   | 397 (0·8)      | 117 (0·2)            | 5,214 (10·3)        |
| 10   | 7,922  | 30 (0·4)    | 103 (1·3)      | 19 (0·2)             | 1,130 (14·3)        | 41,103     | 121 (0·3)   | 293 (0·7)      | 91 (0·2)             | 4,194 (10·2)        |

**Supplementary table 1.** Yearly prevalence of hospital contacts for anxiety, depression, and bipolar disorder and of dispensed prescriptions for antidepressants in patients with IBD and reference individuals. Time is indicated relative to time of IBD diagnosis/index date. IBD, inflammatory bowel disease.

|                               | Age group/sex | IBD (n=22,103) |      | References (n=110,515) |      | OR (95% CI)   | P-value |
|-------------------------------|---------------|----------------|------|------------------------|------|---------------|---------|
|                               |               | Cases          | %    | Cases                  | %    |               |         |
| <b>Anxiety</b>                | 18-39 years   | 80             | 0.9  | 294                    | 0.6  | 1.4 (1.1-1.7) | 0.7993  |
|                               | 40-59 years   | 53             | 0.8  | 191                    | 0.6  | 1.4 (1.0-1.9) |         |
|                               | 60+ years     | 28             | 0.5  | 87                     | 0.3  | 1.5 (1.2-1.8) |         |
|                               | Female        | 107            | 0.9  | 410                    | 0.7  | 1.3 (1.1-1.6) |         |
|                               | Male          | 54             | 0.5  | 162                    | 0.3  | 1.5 (1.2-1.8) |         |
| <b>Depression</b>             | 18-39 years   | 191            | 2.0  | 835                    | 1.8  | 1.1 (1.0-1.3) | 0.0022  |
|                               | 40-59 years   | 185            | 2.7  | 555                    | 1.6  | 1.7 (1.4-2.0) |         |
|                               | 60+ years     | 183            | 3.1  | 594                    | 2.0  | 1.4 (1.3-1.6) |         |
|                               | Female        | 385            | 3.2  | 1,389                  | 2.3  | 1.4 (1.2-1.6) |         |
|                               | Male          | 174            | 1.7  | 595                    | 1.2  | 1.4 (1.3-1.6) |         |
| <b>Bipolar disorder</b>       | 18-39 years   | 16             | 0.2  | 67                     | 0.1  | 1.2 (0.7-2.1) | 0.2252  |
|                               | 40-59 years   | 13             | 0.2  | 108                    | 0.3  | 0.6 (0.3-1.1) |         |
|                               | 60+ years     | 17             | 0.3  | 93                     | 0.3  | 0.9 (0.6-1.2) |         |
|                               | Female        | 33             | 0.3  | 169                    | 0.3  | 1.0 (0.7-1.4) |         |
|                               | Male          | 13             | 0.1  | 99                     | 0.2  | 0.8 (0.6-1.1) |         |
| <b>Use of antidepressants</b> | 18-39 years   | 1,214          | 12.9 | 5,014                  | 10.7 | 1.2 (1.2-1.3) | <.0001  |
|                               | 40-59 years   | 1,461          | 21.4 | 5,002                  | 14.6 | 1.6 (1.5-1.7) |         |
|                               | 60+ years     | 1,540          | 26.2 | 5,293                  | 18.0 | 1.5 (1.4-1.5) |         |
|                               | Female        | 2,862          | 23.9 | 10,200                 | 17.0 | 1.5 (1.5-1.6) |         |
|                               | Male          | 1,353          | 13.4 | 5,109                  | 10.1 | 1.4 (1.4-1.5) |         |

**Supplementary table 2.** Risk divided by age of diagnosis and sex of having a hospital contact for anxiety, depression, or bipolar disorder or having a dispensed prescription for antidepressants in the five years before IBD diagnosis/index date. IBD, inflammatory bowel disease; PY, person-years; OR, odds ratio.

|                                                | <b>IBD (n=17,817)</b> | <b>Crohn's disease (n=5,378)</b> | <b>Ulcerative colitis (n=12,439)</b> | <b>References (n=94,916)</b> |
|------------------------------------------------|-----------------------|----------------------------------|--------------------------------------|------------------------------|
| <b>Mean age at IBD diagnosis or index date</b> | 44.5 years            | 41.2 years                       | 46.0 years                           | 45.1 years                   |
| <b>Age at diagnosis or index date</b>          |                       |                                  |                                      |                              |
| 18-39                                          | 8,137 (45.7%)         | 2,864 (53.3%)                    | 5,273 (42.4%)                        | 41,805 (44.0%)               |
| 40-59                                          | 5,354 (30.0%)         | 1,485 (27.6%)                    | 3,869 (31.1%)                        | 29,058 (30.6%)               |
| 60 +                                           | 4,326 (24.3%)         | 1,029 (19.1%)                    | 3,297 (26.5%)                        | 24,053 (25.3%)               |
| <b>Sex</b>                                     |                       |                                  |                                      |                              |
| Female                                         | 9,084 (51.0%)         | 2,945 (54.8%)                    | 6,139 (49.4%)                        | 49,533 (52.2%)               |
| Male                                           | 8,733 (49.0%)         | 2,433 (45.2%)                    | 6,300 (50.6%)                        | 45,383 (47.8%)               |
| <b>Year of IBD diagnosis or index date</b>     |                       |                                  |                                      |                              |
| 2003-2006                                      | 6,401 (35.9%)         | 1,862 (34.6%)                    | 4,539 (36.5%)                        | 33,892 (35.7%)               |
| 2007-2010                                      | 6,630 (37.2%)         | 1,952 (36.3%)                    | 4,678 (37.6%)                        | 35,447 (37.3%)               |
| 2011-2013                                      | 4,786 (26.9%)         | 1,564 (29.1%)                    | 3,222 (25.9%)                        | 25,577 (26.9%)               |

**Supplementary table 3.** Baseline characteristics of all patients diagnosed with IBD at age 18 or later and reference individuals in Denmark between 2003-2013 with no history of psychiatric disease in the five years before cohort entry. IBD, inflammatory bowel disease.

|                               | Age group/sex | IBD (n=17,817) |            | References (n=94,884) |            | HR (95% CI)   | P-value |        |
|-------------------------------|---------------|----------------|------------|-----------------------|------------|---------------|---------|--------|
|                               |               | Cases          | IR/1000 PY | Cases                 | IR/1000 PY |               |         |        |
| <b>Anxiety</b>                | 18-39 years   | 125            | 1.50       | 577                   | 1.35       | 1.1(0.9-1.4)  | 0.1089  |        |
|                               | 40-59 years   | 62             | 1.15       | 229                   | 0.77       | 1.5 (1.1-2.0) |         |        |
|                               | 60+ years     | 60             | 1.76       | 256                   | 1.23       | 1.5 (1.1-2.0) |         |        |
|                               | Female        | 154            | 1.75       | 667                   | 1.36       | 1.3 (1.1-1.5) |         | 0.8282 |
|                               | Male          | 93             | 1.12       | 395                   | 0.90       | 1.3 (1.0-1.6) |         |        |
| <b>Depression</b>             | 18-39 years   | 249            | 3.02       | 1,090                 | 2.57       | 1.2 (1.0-1.4) | <.0001  |        |
|                               | 40-59 years   | 137            | 2.57       | 429                   | 1.46       | 1.8 (1.5-2.2) |         |        |
|                               | 60+ years     | 191            | 5.70       | 600                   | 2.91       | 2.0 (1.7-2.3) |         |        |
|                               | Female        | 327            | 3.76       | 1,303                 | 2.67       | 1.4 (1.3-1.6) |         | 0.1252 |
|                               | Male          | 250            | 3.04       | 816                   | 1.87       | 1.6 (1.4-1.9) |         |        |
| <b>Bipolar disorder</b>       | 18-39 years   | 26             | 0.31       | 135                   | 0.31       | 1.0 (0.7-1.5) | 0.0549  |        |
|                               | 40-59 years   | 11             | 0.20       | 44                    | 0.15       | 1.4 (0.7-2.7) |         |        |
|                               | 60+ years     | 9              | 0.26       | 19                    | 0.09       | 3.0 (1.3-6.6) |         |        |
|                               | Female        | 27             | 0.30       | 113                   | 0.23       | 1.3 (0.9-2.0) |         | 0.7482 |
|                               | Male          | 19             | 0.23       | 85                    | 0.19       | 1.2 (0.7-1.9) |         |        |
| <b>Use of antidepressants</b> | 18-39 years   | 1,447          | 19.49      | 6,130                 | 15.73      | 1.2 (1.2-1.3) | <.0001  |        |
|                               | 40-59 years   | 1,015          | 21.48      | 3,871                 | 14.21      | 1.5 (1.4-1.6) |         |        |
|                               | 60+ years     | 1,103          | 37.68      | 4,718                 | 25.00      | 1.5 (1.4-1.6) |         |        |
|                               | Female        | 2,058          | 27.09      | 8,888                 | 20.13      | 1.3 (1.3-1.4) |         | 0.2261 |
|                               | Male          | 1,507          | 20.15      | 5,831                 | 14.25      | 1.4 (1.3-1.5) |         |        |

**Supplementary table 4.** Risk divided by age of diagnosis and sex of having a hospital contact for anxiety, depression, or bipolar disorder or having a dispensed prescription for antidepressants in the ten years following IBD diagnosis/index date in patients with IBD and reference individuals with no prior contacts for those diseases or prescriptions for antidepressants in the five years before IBD diagnosis/index date. IBD, inflammatory bowel disease; IR, incidence rate; PY, person-years; HR, hazard ratio.

| <b>Indication</b>                    | <b>Total</b> | <b>Total without” No indication”</b> |
|--------------------------------------|--------------|--------------------------------------|
| <b>Depression</b>                    | 43·4%        | 77·8%                                |
| <b>Anxiety</b>                       | 6·2%         | 11·2%                                |
| <b>Bipolar disorder</b>              | 0·001%       | 0·003%                               |
| <b>Obsessive-compulsive disorder</b> | 0·3%         | 0·5%                                 |
| <b>Pain</b>                          | 0·7%         | 1·2%                                 |
| <b>For diseases of the mind</b>      | 5·0%         | 8·9%                                 |
| <b>Other</b>                         | 0·2%         | 0·4%                                 |
| <b>No indication</b>                 | 44·2%        | NA                                   |

**Supplementary table 5.** Indications for dispensed prescriptions for antidepressants. NA, not applicable.

| Year | Percentage of those with a contact for depression who also had a prescription |            | Percentage of those with a prescription who also had a contact for depression |            |
|------|-------------------------------------------------------------------------------|------------|-------------------------------------------------------------------------------|------------|
|      | IBD                                                                           | References | IBD                                                                           | References |
| -5   | 89%                                                                           | 84%        | 7%                                                                            | 7%         |
| -4   | 87%                                                                           | 85%        | 7%                                                                            | 7%         |
| -3   | 86%                                                                           | 85%        | 7%                                                                            | 7%         |
| -2   | 86%                                                                           | 86%        | 7%                                                                            | 7%         |
| -1   | 90%                                                                           | 86%        | 9%                                                                            | 7%         |
| 0    | 89%                                                                           | 87%        | 11%                                                                           | 7%         |
| 1    | 88%                                                                           | 84%        | 9%                                                                            | 7%         |
| 2    | 88%                                                                           | 85%        | 8%                                                                            | 7%         |
| 3    | 85%                                                                           | 84%        | 8%                                                                            | 7%         |
| 4    | 87%                                                                           | 86%        | 7%                                                                            | 7%         |
| 5    | 87%                                                                           | 84%        | 8%                                                                            | 6%         |
| 6    | 87%                                                                           | 82%        | 8%                                                                            | 6%         |
| 7    | 83%                                                                           | 84%        | 6%                                                                            | 6%         |
| 8    | 87%                                                                           | 80%        | 8%                                                                            | 6%         |
| 9    | 85%                                                                           | 84%        | 7%                                                                            | 6%         |
| 10   | 85%                                                                           | 86%        | 8%                                                                            | 6%         |

**Supplementary table 6.** Comparison between having hospital contacts for depression and having dispensed prescriptions for antidepressants by year in patients with IBD and in reference individuals. IBD, inflammatory bowel disease.
